# Supplementary material for: Impact of initial solvent on thermal stability and mechanical properties of recombinant spider silk films
Source: Royal Society of Chemistry journal article supplement (doi:10.1039/c1jm11700a), 2011-01-01
Supplement: c1jm11700a.pdf [file c1jm11700a.pdf]

## Supplementary

### Impact of initial solvent on thermal stability and mechanical properties of recombinant spider silk films

*Kristina Spiess<sup>§</sup>, Roxana Ene<sup>§§</sup>, Caroline D. Keenan<sup>§§§</sup>, Jürgen Senker<sup>§§§</sup>, Friedrich Kremer<sup>§§</sup> and  
Thomas Scheibel<sup>\*§</sup>*

<sup>§</sup>Lehrstuhl Biomaterialien, Universität Bayreuth, D-95445 Bayreuth, Germany, <sup>§§</sup>Institut für  
Experimentelle Physik I, Universität Leipzig, D-04103 Leipzig, Germany, <sup>§§§</sup> Lehrstuhl Anorganische  
Chemie I, Universität Bayreuth, D-95445 Bayreuth, Germany.

thomas.scheibel@bm.uni-bayreuth.de

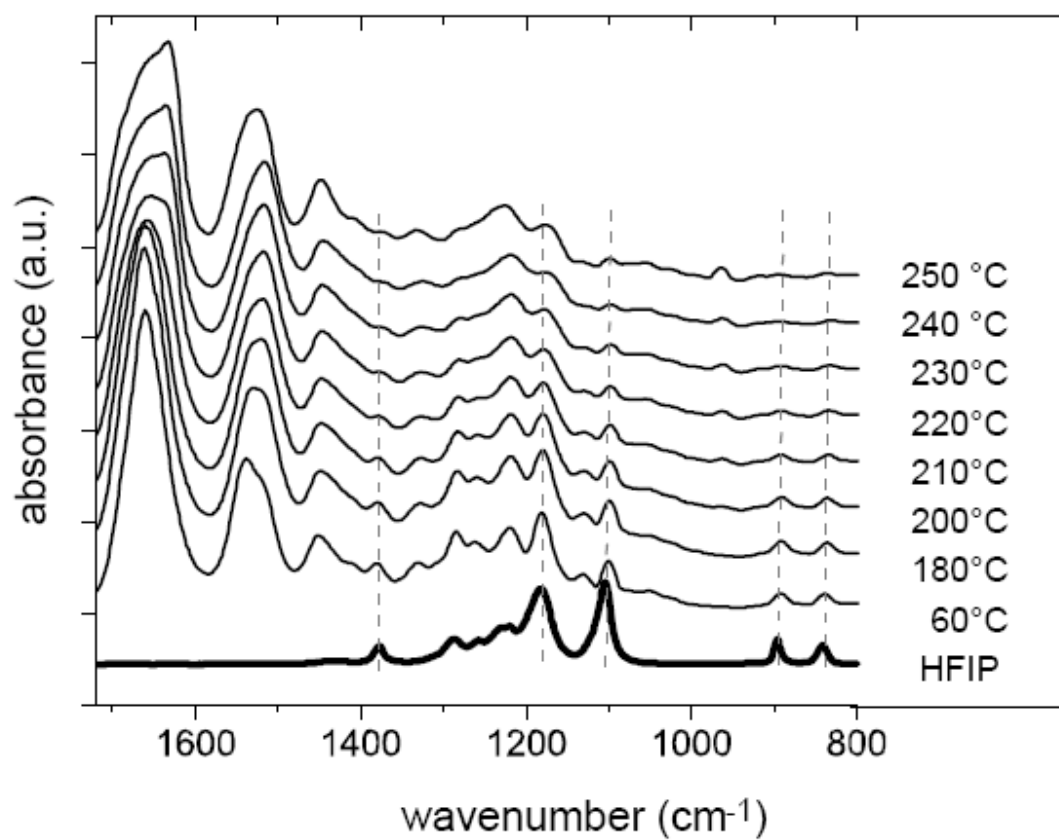

**Figure S1:** FTIR spectra of eADF4(C16) films cast from HFIP at different temperatures. The evaporation and removal of the solvent HFIP (lower curve) can be followed by the indicated characteristic peaks.

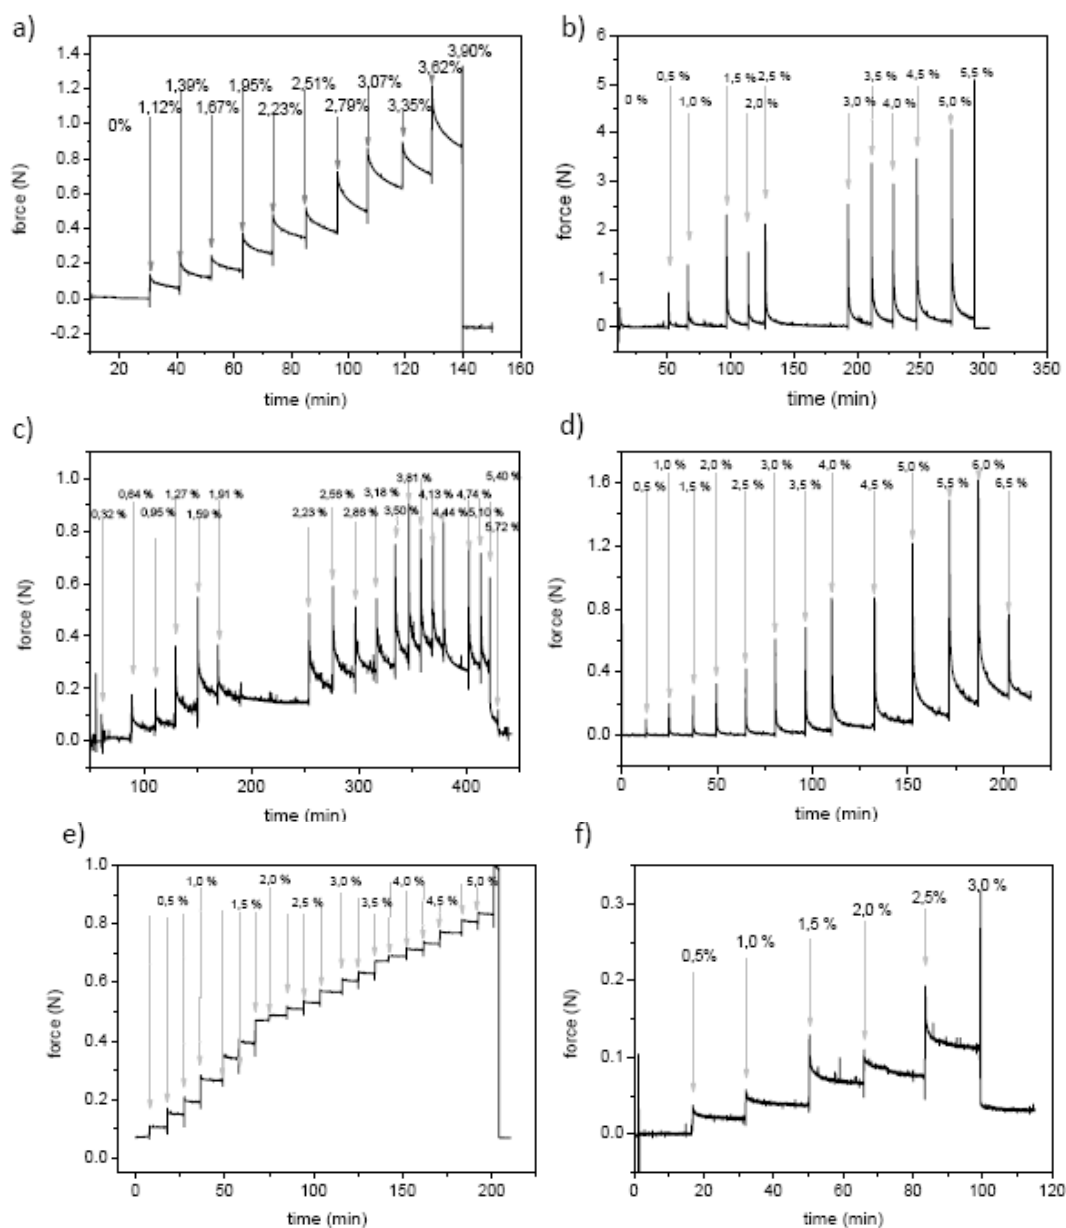

**Figure S2:** Force curves obtained by simultaneous stretching / FTIR measurements. Films were glued to an apparatus (see experimental), stretched stepwise by a micrometer screw (reflected by a sharp increase in force), allowed to relax and analyzed by FTIR. Films cast from FA as cast (a) and methanol treated (b); films cast from aqueous solution before (c) and after (d) methanol treatment; HFIP films as cast (e) and methanol treated (f).
